# Supplementary material for: COVID-19 in Pregnancy: Knowledge about the Vaccine and the Effect of the Virus. Reliability and Results of the MAMA-19 Questionnaire
Source: MDPI journal article supplement (doi:10.3390/ijerph192214886), 2022-11-12
Supplement: s1 [file s1]

English translation of the MAMA-19 questionnaire on the basis of the results obtained.

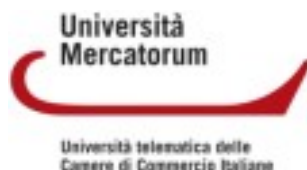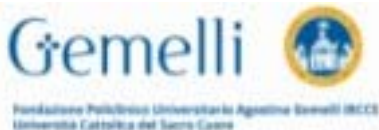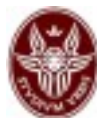

SAPIENZA  
UNIVERSITÀ DI ROMA

## MAMA19

### QUESTIONNAIRE ON COVID-19 VACCINATION DURING PREGNANCY AND PUERPERIUM: EFFECTIVENESS OF COMMUNICATION BY INSTITUTIONS AND THE CLINICAL WORLD

Dear Madam,

We would like you to participate to this anonymous survey concerning the COVID-19 vaccination during pregnancy and post-partum. The purpose is to investigate the effectiveness of risk communication in health care in particular crisis situations. We ask you to answer freely and truthfully, you will not be judged in any way. The results from the completed questionnaires will be used for the elaboration of a Master's Degree thesis. Thank you!Grazie

### Section S1. General Information

S1.1.Age .....

#### S1.2. Civil status

- ☐ Single
- ☐ Married or with a partner
- ☐ Divorced or Separated
- ☐ Widowed

**S1.3. Educational level**

- ☐ None
- ☐ Primary school
- ☐ secondary school
- ☐ high school
- ☐ Graduated

**S1.4. Which region of Italy do you live in? .....**

**S1.5. Nationality**

- ☐ Italian
- ☐ Other (specify) .....

**S1.6. Are you currently employed?**

- ☐ Yes
- ☐ No

**S1.7. If you have a partner or married. Is your partner working?**

- Yes
- No

**S1.8. How many conceptions have you had in your life?**

- ☐ 1
- ☐ 2
- ☐ 3
- ☐ 4 or more

**S1.9. Gestational age in weeks (number): .....**

**S1.10. Type of birth:**

- ☐ Vaginal birth
- ☐ Cesarean birth

**S1.11. Number of sons before this delivery:**

- ☐ 1
- ☐ 2
- ☐ 3 or more

**S1.12. During this pregnancy how many obstetrical visits did you have?**

- ☐ Less than 4
- ☐ Form 4 to 9 (about one per month)
- ☐ More than 9 (it happened more than 9 per month)

**S1.13. Did you receive a flu vaccination during pregnancy?**

- ☐ Yes
- ☐ No

**S1.13A. If no, what is the reason for non-vaccination?**

- ☐ I was not recommended to do it
- ☐ I afraid of side effects on myself and/or the child
- ☐ I think that it isn't necessary for me
- ☐ I could not find a place to do it
- ☐ Other reason (specify) .....

**S1.14. Before you knew you were pregnant, were you concerned about COVID19 infection for yourself before pregnancy?**

- Yes
- No

**S1.15. Before you knew you were pregnant, were you concerned about COVID19 infection for people you care about (parents, partner, relatives, other children, friends, etc.) before your pregnancy?**

- Yes
- No

## **Section S2. KNOWLEDGE ABOUT EFFECT of COVID-19 VACCINATION DURING PREGNANCY**

**Please choose a value from 1 to 5 (1=strongly disagree; 2=disagree; 3=neutral; 4=agree; 5=strongly agree)**

### **S2.1 Pregnant women who get COVID-19 vaccination risk to have:**

#### **S2.1A Neonates malformations**

1 2 3 4 5

#### **S2.1B Premature delivery**

1 2 3 4 5

#### **S2.1C Intra Uterin Growth Restriction (IUGR) 1**

2 3 4 5

### **S2.2 Pregnant women not vaccinated against COVID-19 have the same complications, in case of a positive test result, as vaccinated pregnant women**

- ☐ Don't know
- ☐ true
- ☐ false

### **S2.3 COVID-19 vaccine reduces mortality**

- ☐ Don't know
- ☐ true
- ☐ false

### **S2.4 COVID-19 vaccine reduces risk of hospitalization**

- Don't know
- true
- false

### **S2.5 COVID-19 vaccine reduces short-term infectiousness**

- Don't know
- true
- false

### **S2.6 COVID-19 vaccine reduces mortality during pregnancy**

- Don't know
- true
- false

## **SECTION S3. KNOWLEDGE ABOUT EFFECT OF COVID-19 INFECTIONS DURING THE PREGNANCY**

### **S3.0 Pregnant women have a higher risk of complications from COVID-19 infection than women who are not pregnant**

- Don't know
- Same risk
- True
- Partial true, only in certain cases

### **S3.1 COVID-19 infection can be highly contagious**

- ☐ No
- ☐ Yes
- ☐ Don't Know

### **S3.2 Being infected with COVID-19 may require hospitalisation**

- No
- Yes, in certain cases
- Yes, always
- I don't know

### **S3.3 Possible post COVID-19 consequences in the unvaccinated: (possible more answers)**

- Excessive tiredness and fatigue
- Headache
- Attention and memory disorders
- Abnormal hair loss
- Shortness of breath and breathing difficulties
- Cough
- Anosmia and ageusia
- Joint pain
- Abnormal sweating
- Chest pain
- Excessive fatigue after physical activity
- Nausea and vomit
- Memory loss

## **SECTION S4. SOURCES OF INFORMATION USED ON VACCINATION AND IMPACT OF COVID-19 DISEASE**

### **S4.1 I received information on the effects of COVID-19 disease in pregnancy from: (possible more answers)**

- ☐ Health personnel (general practitioner, gynaecologist, obstetrics, etc.)
- ☐ No health personnel (friends, parents, etc.)
- ☐ My self (internet/TV/ etc.)
- ☐ I didn't inform

### **S4.2 I have used institutional media to get information about COVID-19 vaccination in pregnancy. (Istitutional media are web site, documents, papers or television programs sponsorized from Minister of health, Local Health Unit, etc. ).**

- ☐ Yes
- ☐ No

### **S4.3 If yes, institutional media used to obtain information on COVID-19 vaccination in pregnancy: (possible more answers)**

- ☐ Internet
- ☐ TV
- ☐ Newspapers
- ☐ Journals
- ☐ Radio
- ☐ Green number / call center dedicated
- ☐ Other (specify) .....

### **S4.4 A I have approached professionals for information about COVID-19 vaccination in pregnancy (general practitioner, gynaecologist, obstetrics, etc)**

- ☐ Yes
- ☐ No

### **S4.4B I have approached professionals for information about COVID-19 disease in pregnancy (general practitioner, gynaecologist, obstetrics, etc)**

- ☐ Yes
- ☐ No

### **S4.5 Which professionals did you turn to: (possible more answers)**

- General practitioner
- Gynecologist
- Midwife
- Nurse
- Pharmacist
- ASLd
- Childbirth preparation course

- Vaccination centre

**S4.6 I'm sufficiently satisfied with communication with professionals: (possible more answers)**

- General practitioner
- Gynecologist
- Midwife
- Nurse
- Pharmacist
- ASL
- Childbirth preparation course
- Vaccination centre

**S4.7 If you have consulted more than one professional, have you received consistent information?**

- Yes
- no

## **SECTION 5. PERSONAL POSITION ABOUT COVID-19 VACCINATION**

### **S5.1 Have you been vaccinated (two or more doses) for COVID-19??**

- ☐ yes
- ☐ No

### **S5.2 If yes, when did you have your first dose?**

- ☐ Before pregnancy
- ☐ I trimester
- ☐ II e III trimester

### **S5.3 If no, wants to vac-cinate, what is the reason for not vaccinating?**

- ☐ Poor knowledge
- ☐ Fear
- ☐ Previous COVID-19
- ☐ Healthcare providers does not
- ☐ My parents/ relatives suggest to me no vaccine
- ☐ For my patologies ....
- ☐ I'm wating
- ☐ Other specify .....

### **S5.4 If you are waiting, what is the reason for the delay in vaccination?**

- ☐ After the end of breastfeeding
- ☐ I am not convinced about the effectiveness of the vaccine
- ☐ I did not know about the possibility of the vaccine during the pregnancy
- ☐ Waiting term of pregnancy
- ☐ Previous COVID-19

**Thanks for your collaboration**
