# Supplementary material for: COVID-19 in Pregnancy: Knowledge about the Vaccine and the Effect of the Virus. Reliability and Results of the MAMA-19 Questionnaire
Source: MDPI journal article supplement (doi:10.3390/ijerph192214886), 2022-11-12
Supplement: s1 [file s1]

# The vaccination Attitudes Examination Scale (VAX-I)

## Versione Italiana

**Istruzioni.** Queste domande sono progettate per aiutarci a comprendere meglio le convinzioni delle persone sulle vaccinazioni. Le chiedo di contrassegnare le risposte che riflettono più accuratamente i suoi sentimenti o le sue convinzioni. Non ci sono risposte giuste o sbagliate.

|                                                                                                                                  |                             |   |   |   |   |   |                         |   |
|----------------------------------------------------------------------------------------------------------------------------------|-----------------------------|---|---|---|---|---|-------------------------|---|
| 1. Mi sento al sicuro dopo essere stata/o vaccinata/o. (-)                                                                       | Fortemente in<br>Disaccordo | 1 | 2 | 3 | 4 | 5 | Fortemente<br>D'accordo | 6 |
| 2. Posso contare sui vaccini per fermare le malattie infettive gravi. (-)                                                        | Fortemente in<br>Disaccordo | 1 | 2 | 3 | 4 | 5 | Fortemente<br>D'accordo | 6 |
| 3. Mi sento protetto/a dopo essermi vaccinato/a. (-)                                                                             | Fortemente in<br>Disaccordo | 1 | 2 | 3 | 4 | 5 | Fortemente<br>D'accordo | 6 |
| 4. Sebbene la maggior parte dei vaccini sembri sicura, potrebbero esserci dei problemi non ancora scoperti.                      | Fortemente in<br>Disaccordo | 1 | 2 | 3 | 4 | 5 | Fortemente<br>D'accordo | 6 |
| 5. I vaccini possono causare problemi imprevedibili nei bambini.                                                                 | Fortemente in<br>Disaccordo | 1 | 2 | 3 | 4 | 5 | Fortemente<br>D'accordo | 6 |
| 6. Mi preoccupano gli effetti sconosciuti che i vaccini potrebbero avere in futuro.                                              | Fortemente in<br>Disaccordo | 1 | 2 | 3 | 4 | 5 | Fortemente<br>D'accordo | 6 |
| 7. I vaccini fanno guadagnare molti soldi alle aziende farmaceutiche, ma in realtà non sono utili alle persone.                  | Fortemente in<br>Disaccordo | 1 | 2 | 3 | 4 | 5 | Fortemente<br>D'accordo | 6 |
| 8. Le autorità promuovono la vaccinazione a scopo di lucro e non per la salute delle persone.                                    | Fortemente in<br>Disaccordo | 1 | 2 | 3 | 4 | 5 | Fortemente<br>D'accordo | 6 |
| 9. I programmi di vaccinazione sono una grande truffa.                                                                           | Fortemente in<br>Disaccordo | 1 | 2 | 3 | 4 | 5 | Fortemente<br>D'accordo | 6 |
| 10. L'immunità naturale dura più a lungo di una vaccinazione.                                                                    | Fortemente in<br>Disaccordo | 1 | 2 | 3 | 4 | 5 | Fortemente<br>D'accordo | 6 |
| 11. L'esposizione naturale a virus e germi offre la protezione più sicura.                                                       | Fortemente in<br>Disaccordo | 1 | 2 | 3 | 4 | 5 | Fortemente<br>D'accordo | 6 |
| 12. Per il sistema immunitario è più sicuro essere esposti in modo naturale alle malattie piuttosto che tramite la vaccinazione. | Fortemente in<br>Disaccordo | 1 | 2 | 3 | 4 | 5 | Fortemente<br>D'accordo | 6 |

**Calcolo dei punteggi.** I punteggi della scala e delle sottoscale si ottengono dalle medie dei punteggi degli item (Item 1, 2, 3 = F1: sfiducia nei benefici dei vaccini; Item 4, 5, 6 = F2: preoccupazione per futuri effetti imprevisi; Item 7, 8, 9 = F3: preoccupazione per i profitti commerciali; Item 10, 11, 12 = F4: preferenza per l'immunità naturale). (-) Codifica inversa

VAX questionnaire (original version)

Source: Martin, L.R.; Petrie, K.J. Understanding the dimensions of anti-vaccination attitudes: The vaccination attitudes examination (VAX) Scale. *Ann. Behav. Med.* **2017**, *51*, 652–660.

**Study 1 VAX scale items factor loading matrix (EFA)**

| Items                                                                                                      | Mistrust of vaccine benefit |
|------------------------------------------------------------------------------------------------------------|-----------------------------|
| I feel safe after being vaccinated (–)                                                                     | <b>.799</b>                 |
| I can rely on vaccines to stop serious infectious diseases (–)                                             | <b>.711</b>                 |
| I feel protected after getting vaccinated (–)                                                              | <b>.761</b>                 |
| Although most vaccines appear to be safe, there may be problems that we have not yet discovered.           | .142                        |
| Vaccines can cause unforeseen problems in children.                                                        | .227                        |
| I worry about the unknown effects of vaccines in the future.                                               | .139                        |
| Vaccines make a lot of money for pharmaceutical companies, but do not do much for regular people.          | .202                        |
| Authorities promote vaccination for financial gain, not for people's health.                               | .251                        |
| Vaccination programs are a big con.                                                                        | .286                        |
| Natural immunity lasts longer than a vaccination.                                                          | .112                        |
| Natural exposure to viruses and germs gives the safest protection.                                         | .081                        |
| Being exposed to diseases naturally is safer for the immune system than being exposed through vaccination. | .190                        |
