# Supplementary material for: COVID-19 in Pregnancy: Knowledge about the Vaccine and the Effect of the Virus. Reliability and Results of the MAMA-19 Questionnaire
Source: MDPI journal article supplement (doi:10.3390/ijerph192214886), 2022-11-12
Supplement: s1 [file s1]

Source: Mappa I, Luviso M FA, Disefano MA, et al. Women perception of SARS-CoV-2 vaccination during pregnancy and subsequent maternal anxiety: a prospective observational study. *J Matern Fetal Neonatal Med* 2021;1-4. <https://doi.org/10.1080/14767058.2021.1910672> Supplementary material page 3.

## STAI QUESTIONNAIRE

### PART A

1) Did you get the flu vaccination during pregnancy?

- Yes
- No
- I'm waiting to run it

2) In the answer is no to the previous question, what is the reason for not vaccinating?

- I was not advised to do so
- I was afraid of the side effects on me and the baby
- I do not consider it necessary
- I couldn't find it

3) Did you have information on the effects of Covid-19 (SARS-COV 2) in pregnancy?

- No
- Yes from my gynaecologist, general practitioner
- I read on internet/ Journal, Television

4) Did you have any information on the effects of Covid 19 vaccine in pregnancy?

- No
- Yes from my gynaecologist, general practitioner
- I read on internet/ Journal, Television

5) In a range of 1-5, how worried are you that the Covid 19 vaccine could cause malformation on your baby?

6) In a range of 1-5, how worried are you that the Covid 19 vaccine could cause premature birth?

7) In a range of 1-5, how worried are you that the Covid 19 vaccine could cause growth restriction?

8) Covid 19 infection is highly contagious?

- Surely not
- I do not think so
- I do not know
- I think so
- Surely

9) Covid 19 infection can sometimes be severe enough to require hospitalization?

- Surely not
- I do not think so
- I do not know
- I think so
- Surely

10) Young children are at higher risk of having to be hospitalized due to Covid 19 infection than adults

- Surely not
- I do not think so
- I do not know
- I think so
- Surely

11) Pregnant women run the same risk of complications from Covid 19 infection as women who are not pregnant?

- Surely not
- I do not think so
- I do not know
- I think so
- Surely

12) The Covid 19 vaccine is safe?

- Surely not
- I do not think so
- I do not know
- I think so
- Surely

13) The Covid 19 vaccine is effective?

- Surely not
- I do not think so
- I do not know
- I think so
- Surely

14) The Covid 19 vaccine is safe in pregnancy?

- Surely not
- I do not think so
- I do not know
- I think so
- Surely

15) You would like to have the anti-covid 19 vaccination during pregnancy?

- Surely not
- I do not think so
- I do not know
- I think so
- Surely

16) What importance do you give to the start of anti-Covid 19 vaccinations?

- turning point in the pandemic
- useless
- propaganda
- I have no idea
